# Supplementary material
Source: Springer Nature journal article supplement (https://www.springermedizin.de/resource/supplementary/12936_2012_2204_MOESM4_ESM.pdf/9542816)

Standard culture

3D7

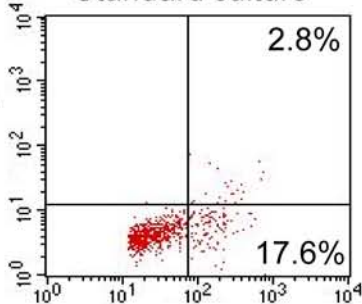

Gcyte induction

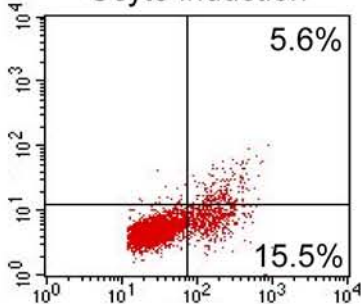

F12

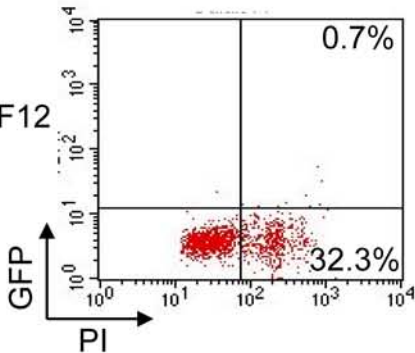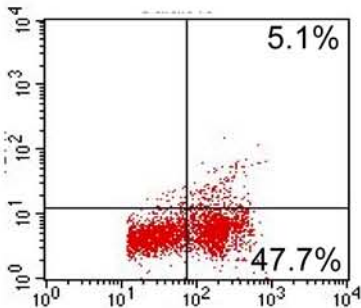

Supplement: MOESM4 [file 9542816]
